# Supplementary material
Source: PubMed Central journal article supplement (PMC9936754)
Supplement: 40659_2023_414_MOESM4_ESM.pdf [file 40659_2023_414_MOESM4_ESM.pdf]

**Additional File 4.** Structural annotation of protein coding genes for both earwig species.

|                             | <i>Forficula auricularia</i> | <i>Euborellia annulipes</i> |
|-----------------------------|------------------------------|-----------------------------|
| Number of genes             | 31779                        | 40028                       |
| Number of CDSs              | 33587                        | 42675                       |
| Number of exons             | 147010                       | 198427                      |
| Number of introns           | 117244                       | 162278                      |
| Number of genes overlapping | 156                          | 119                         |
| Number of single exon gene  | 10026                        | 11177                       |
| Total gene length           | 310662.7 kb                  | 250644 kb                   |
| Total mRNA length           | 361038 kb                    | 301001.8 kb                 |
| Total CDSs length           | 30234.7 kb                   | 44792.7 kb                  |
| Total exon length           | 43,150 kb                    | 59108 kb                    |
| Total intron length         | 330803.6 kb                  | 256209 kb                   |
| Total 5' UTR length         | 7758 kb                      | 9722 kb                     |
| Total 3' UTR length         | 5157 kb                      | 4593 kb                     |
| Mean gene length            | 9.8 kb                       | 6,3 kb                      |
| Mean CDSs length            | 0.9 kb                       | 1.049 kb                    |
| Mean exon length            | 293 bp                       | 297 bp                      |
| Mean intron length          | 2821 bp                      | 1578 bp                     |
| Mean 5' UTR length          | 3454 bp                      | 2351 bp                     |
| Mean 3' UTR length          | 3274 bp                      | 1921 bp                     |
| Mean mRNAs per gene         | 1.1                          | 1.1                         |
| Mean CDSs per mRNA          | 1.0                          | 1.0                         |
| Mean exons per mRNA         | 4.4                          | 4.6                         |
| Mean introns per mRNA       | 3.5                          | 3.8                         |
| Longest gene                | 266.4 kb                     | 228.5 kb                    |
| Longest CDS                 | 42654 bp                     | 50282 bp                    |
| Longest exon                | 25019 bp                     | 14656 bp                    |
| Longest intron              | 146895 bp                    | 117750 bp                   |
| Shortest gene               | 50 bp                        | 92 bp                       |
| Shortest CDS                | 17 bp                        | 9 bp                        |
| Shortest exon               | 3 bp                         | 3 bp                        |
| Shortest intron             | 7 bp                         | 6 bp                        |
